# Supplementary material
Source: PubMed Central journal article supplement (PMC4351464)
Supplement: mt2014240x1.pdf [file mt2014240x1.pdf]

## SUPPLEMENTARY MATERIALS

Table S1. Study design

| Mice (age of treatment)                              | Control/SD (genotype) | Treatment with AAV9 |
|------------------------------------------------------|-----------------------|---------------------|
| Neonates (1-2 day)<br>(denoted as 'n' in manuscript) | Control (+/+ or +/-)  | HexB (n=5)          |
|                                                      |                       | LacZ (n=5)          |
|                                                      | SD (-/-)              | HexB (n=5)          |
|                                                      |                       | LacZ (n=5)          |
| Adults (6 weeks)<br>(denoted as 'a' in manuscript)   | Control (+/+ or +/-)  | HexB (n=5)          |
|                                                      |                       | LacZ (n=5)          |
|                                                      | SD (-/-)              | HexB (n=5)          |
|                                                      |                       | LacZ (n=5)          |

Table S2. Statistical comparisons of control groups that are merged within figures.

| Data/Related Figure                    | Comparison                                                                                                         | P value                                      | Test              |
|----------------------------------------|--------------------------------------------------------------------------------------------------------------------|----------------------------------------------|-------------------|
| Total distance travelled/<br>Figure 1b | at Wk 14<br>a Control-LacZ (n=5)<br>a Control-HexB (n=5)<br>n Control-LacZ (n=4)<br>n Control-HexB (n=5)           | P = 0.7290                                   | one way ANOVA     |
|                                        | at Wk 15<br>a Control-LacZ (n=5)<br>a Control-HexB (n=5)<br>n Control-LacZ (n=4)<br>n Control-HexB (n=5)           | P = 0.7177                                   | one way ANOVA     |
|                                        | at Wk 16<br>a Control-HexB (n=5)<br>n Control-LacZ (n=5)<br>n Control-HexB (n=4)                                   | P = 0.2498                                   | one way ANOVA     |
|                                        | at Wk 21<br>a Control-HexB (n=2)<br>vs<br>n Control-HexB (n=5)                                                     | P = 0.8723                                   | two tailed T-test |
|                                        | at Wk 30<br>n Control-HexB (n=5)                                                                                   | 1 group no intragroup comparison             | none              |
| Vacuolization /<br>Figure 2b           | a Control-LacZ (n=5)<br>a Control-HexB (n=5)<br>n Control-LacZ (n=5)<br>n Control-HexB (n=5)<br><br>in CB<br>Md/Po | <br><br><br><br><br>p = 0.9257<br>p = 0.4182 | one way ANOVA     |

|                                                       |                                                                                                                                                                                                                                             |                                                                                                                                                                                                                                                                                |                    |
|-------------------------------------------------------|---------------------------------------------------------------------------------------------------------------------------------------------------------------------------------------------------------------------------------------------|--------------------------------------------------------------------------------------------------------------------------------------------------------------------------------------------------------------------------------------------------------------------------------|--------------------|
|                                                       | Mid<br>CX/Hp<br>Thy/HY/Sep<br>OA                                                                                                                                                                                                            | p = 0.8900<br>p = 0.5847<br>p = 0.9328<br>p = 0.5472                                                                                                                                                                                                                           |                    |
| G <sub>M2</sub> ganglioside proportions/<br>Figure 2d | a Control-LacZ (n=5)<br>a Control-HexB (n=5)<br>n Control-LacZ (n=5)<br>n Control-HexB (n=5)                                                                                                                                                | p = 0.0913                                                                                                                                                                                                                                                                     | one way ANOVA      |
| Serum hex activity/<br>Figure 3a                      | At wk: 10, 12-14, final<br>a Control-LacZ vs<br>n Control-LacZ<br><br>a Control-HexB vs<br>n Control-HexB<br><br>a Control-LacZ and<br>n Control-LacZ vs<br>a Control-HexB<br><br>a Control-LacZ and<br>n Control-LacZ vs<br>n Control-HexB | p > 0.05 at all times<br>points<br><br>p > 0.05 at all time<br>points<br><br>*p value ≤ 0.05 at all<br>time points (see Fig. S2a)<br><br>*p value ≤ 0.05 at all<br>time points (see Fig. S2a)                                                                                  | two tailed t-tests |
| Brain hex activity/<br>Figure 3b                      | a Control-LacZ vs<br>n Control-LacZ<br><br>a Control-HexB vs<br>n Control-HexB                                                                                                                                                              | p > 0.05<br><br>*p value = 0.0117<br>(see Fig. S2b)                                                                                                                                                                                                                            | Two tailed T-test  |
| Vector copy number in brain/<br>Figure 5              | male vs female                                                                                                                                                                                                                              | a Control = 0.3192<br>M (n=14), F (n=6)<br>n Control = 0.7340<br>M (n=8), F (n=12)<br>a Control-HexB = 0.7870<br>M (n=6), F (n=4)<br>a Control-LacZ = 0.1026<br>M (n=8), F (n=2)<br>n Control-HexB = 0.4203<br>M (n=3), F (n=7)<br>n Control-LacZ = 0.3241<br>M (n=5), F (n=5) | two tailed T-test  |
| Vector copy number in liver/<br>Figure 5              | male vs female                                                                                                                                                                                                                              | a Control = 0.4215 M<br>(n=14), F (n=6)<br>n Control = 0.3524<br>M (n=8), F (n=12)<br>a Control-HexB = 0.5390<br>M (n=6), F (n=4)<br>a Control-LacZ = 0.4323<br>M (n=8), F (n=2)<br>n Control-HexB = 0.2740<br>M (n=3), F (n=7)<br>n Control-LacZ = 0.4650<br>M (n=5), F (n=5) | two tailed T-test  |

## Figures

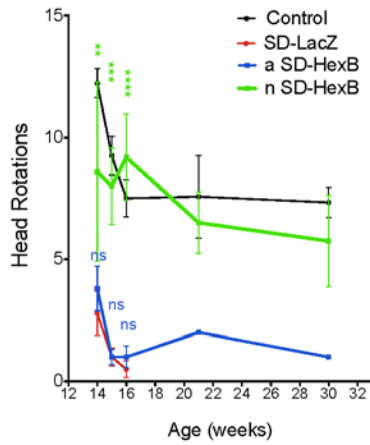

**Figure S1** Head rotations. Mice were videotaped in an open field at 3-5 time points post rAAV9 administration, and head rotations were analyzed using ANY-maze software. Plotted values are average number of head rotations  $\pm$  SEM. \*\*\*\* $p < 0.0001$ ; \*\*\* $p < 0.001$ ; \*\* $p < 0.01$ ; ns- not significant.

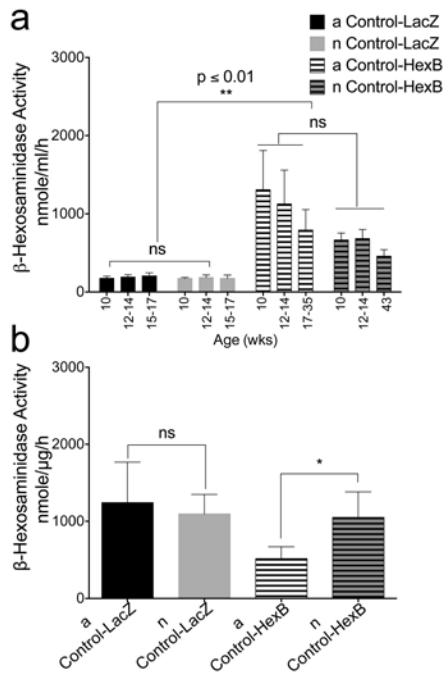

**Figure S2**  $\beta$ -hexosaminidase activity levels in control groups. Total  $\beta$ -hexosaminidase activity was determined using 4-MUG as a substrate. Bars represent the average activity  $\pm$  SEM. (a) Sera were collected at 10, 12-14, and 15-43 wks (just before death). Control animals injected with HexB had significantly more activity than normal LacZ-injected mice. Therefore only LacZ-injected mice were included in Fig.3 of the manuscript as controls. (b) brains were collected at death. The significant difference between the HexB-injected adults and neonates reflects the

different genotypic composition of these two groups (*Hexb*<sup>+/+</sup> vs *Hexb*<sup>+/-</sup>). \*\* indicates  $p < 0.01$ , \* indicates  $p < 0.05$ , ns- not significant.

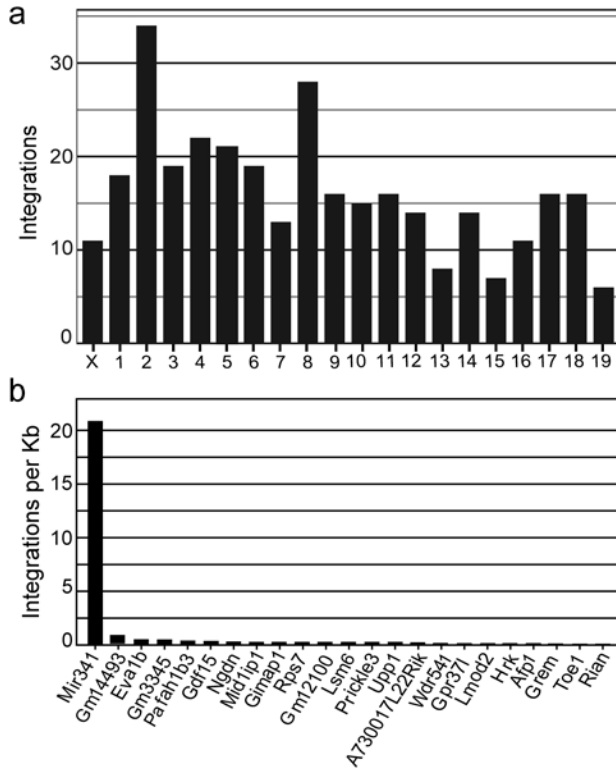

**Figure. S3** AAV9 Integration Sites. (a) Integrations per chromosome. (b) Genes with largest number of integrations per kb of DNA.

**Video S1.** Comparison of the activity of neonatally-treated mice. A SD mouse treated with AAV9-HexB as a neonate (female), an AAV9-LacZ-treated SD mouse (front), and a normal control (*HexB*<sup>+/-</sup> male) treated neonatally with AAV9-HexB were placed in an open field at 16 wks. The LacZ-treated SD mouse at the front of the field exhibits tremors, little movement and does not splay its rear limbs on the tail suspension test. The SD mouse treated as a neonate with AAV9-HexB is on the left side at the beginning of the video.

**Video S2.** Comparison of the activity of adult-treated mice. A SD mouse treated with AAV9-HexB as an adult, an AAV9-LacZ-treated SD mouse (front), and a normal control (*Hexb*<sup>+/-</sup>) treated with AAV9-HexB as an adult were placed in an open field at 16 wks of age. The LacZ-treated SD mouse exhibits little movement and does not splay its rear limbs on a tail suspension

test. The SD mouse treated with AAV9-HexB as an adult is obviously slower than its normal counterpart; its body is very close to the ground compared to the normal mouse.
